# Supplementary material for: Polarization properties of aerosol particles over western Japan:classification, seasonal variation, and implications for air quality
Source: Copernicus journal article supplement (doi:10.5194/acp-16-9863-2016), 2016-08-05
Supplement: Supplementary file 1 [file acp-16-9863-2016-supplement.pdf]

Supplement of Atmos. Chem. Phys., 16, 9863–9873, 2016  
<http://www.atmos-chem-phys.net/16/9863/2016/>  
doi:10.5194/acp-16-9863-2016-supplement  
© Author(s) 2016. CC Attribution 3.0 License.

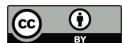

*Supplement of*

## **Polarization properties of aerosol particles over western Japan: classification, seasonal variation, and implications for air quality**

**Xiaole Pan et al.**

*Correspondence to:* Xiaole Pan (panxiaole@mail.iap.ac.cn)

The copyright of individual parts of the supplement might differ from the CC-BY 3.0 licence.

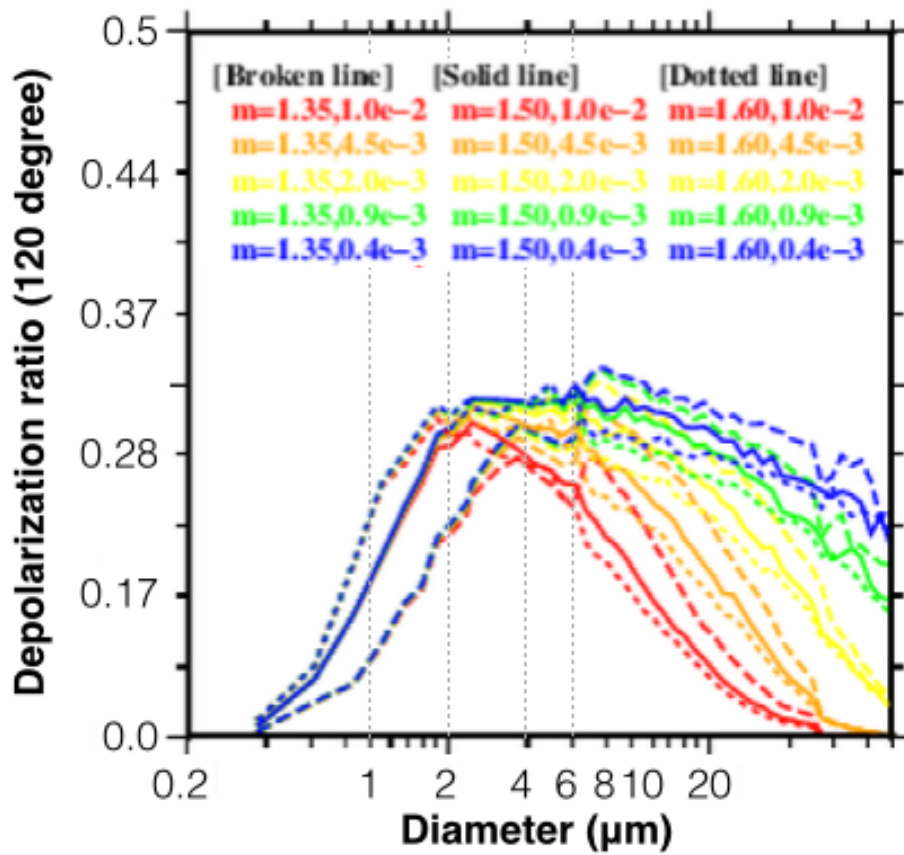

SF.1 Theoretical calculation of depolarization ratio (at 120 backward direction) as a function of particle size for different refractive index. The simulation was on the basis of particles of Voronoi aggregation.

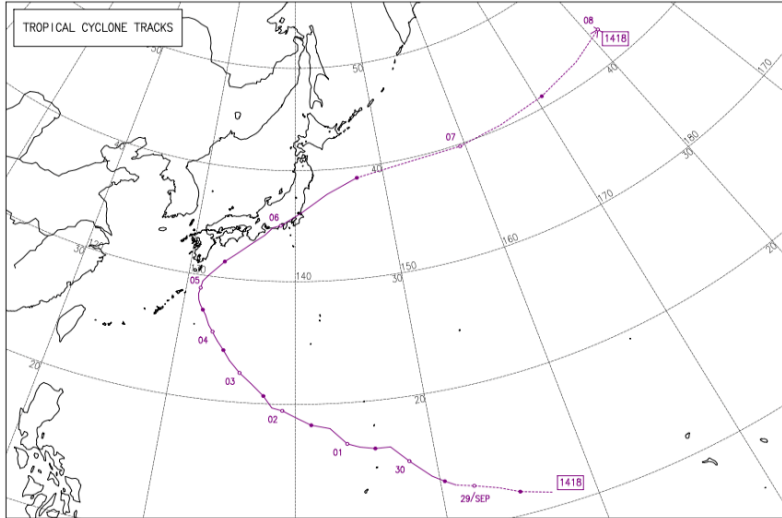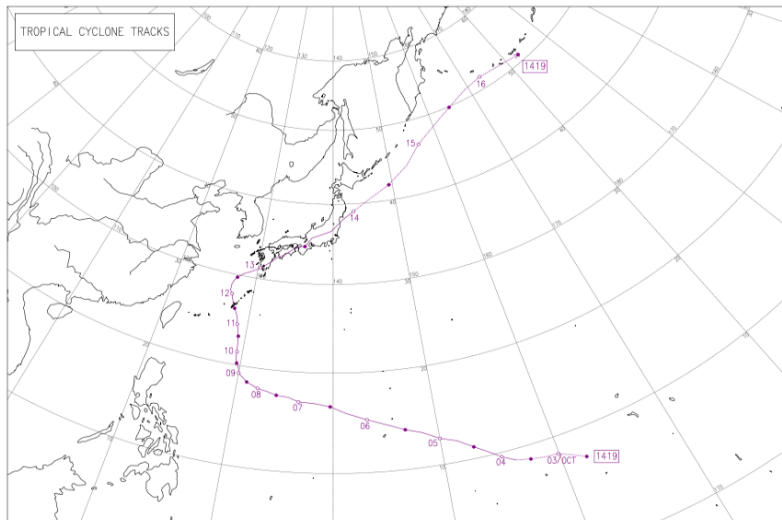

SF. 2 The geographic positions of typhoon center on 4<sup>th</sup> Oct and 13<sup>th</sup> Oct, 2014. No. 18 Phanfone and No. 19 Vongfong) during the study period is provided on the Japan Meteorological Agency webpage ([http://www.data.jma.go.jp/fcd/yoho/typhoon/route\\_map/index.html](http://www.data.jma.go.jp/fcd/yoho/typhoon/route_map/index.html))
